# Supplementary material for: Synaptic activity and strength are reflected by changes in the post-synaptic secretory pathway
Source: Springer Nature journal article supplement (doi:10.1038/s41598-020-77260-2), 2020-11-25
Supplement: MOESM1 [file 41598_2020_77260_MOESM1_ESM.pdf]

## Supplemental Information:

### **Synaptic activity and strength are reflected by changes in the post-synaptic secretory pathway**

Clara-Marie Gürth <sup>1,2,#</sup>, Tal M. Dankovich <sup>3,#</sup>, Silvio O. Rizzoli <sup>3</sup>, Elisa D'Este <sup>4,\*</sup>

<sup>1</sup> Department of NanoBiophotonics, Max Planck Institute for Biophysical Chemistry, Am Fassberg 11, 37077 Göttingen, Germany

<sup>2</sup> Department of Optical Nanoscopy, Max Planck Institute for Medical Research, Jahnstr. 29, 69120 Heidelberg, Germany

<sup>3</sup> Institute for Neuro- and Sensory Physiology, University Medical Center Göttingen, Humboldtallee 23, 37073 Göttingen, Germany

<sup>4</sup> Optical Microscopy Facility, Max Planck Institute for Medical Research, Jahnstr. 29, 69120 Heidelberg, Germany

# Contributed equally to this work

\* Corresponding author: [elisa.deste@mr.mpg.de](mailto:elisa.deste@mr.mpg.de)

**Supplementary Table 1:** List of statistical values and number of synapses per individual experiments.

| <i>Type of analysis</i>                   | <b>Synaptic marker</b>             | <b>POI</b>          | <b>Synapses /bin</b> | <b>Total synapses</b> | <b>Rho</b> | <b>P (spearman)</b> |            |
|-------------------------------------------|------------------------------------|---------------------|----------------------|-----------------------|------------|---------------------|------------|
| <b>Automatic analysis of all synapses</b> | homer                              | calreticulin        | 643                  | 3215                  | 0.956      | 0.00000000          |            |
|                                           |                                    | ERGIC53             | 680                  | 3400                  | 0.889      | 0.00000016          |            |
|                                           |                                    | TGN38               | 379-380              | 1899                  | 0.925      | 0.00000000          |            |
|                                           |                                    | synaptopodin        | 542-543              | 2712                  | 0.968      | 0.00000000          |            |
|                                           |                                    | vGLUT1              | 1138                 | 5690                  | 0.435      | 0.05505578          |            |
|                                           |                                    | SYT1                | 1156-1157            | 5781                  | 0.754      | 0.00012247          |            |
|                                           | vGLUT1                             | calreticulin        | 487-488              | 2439                  | 0.956      | 0.00000000          |            |
|                                           |                                    | ERGIC53             | 265-266              | 1326                  | 0.765      | 0.00013235          |            |
|                                           |                                    | TGN38               | 117-118              | 588                   | 0.876      | 0.00000039          |            |
|                                           |                                    | synaptopodin        | 159-160              | 796                   | 0.833      | 0.00000492          |            |
|                                           | SYT1                               | calreticulin        | 249                  | 1245                  | 0.656      | 0.00168277          |            |
|                                           |                                    | ERGIC53             | 176-177              | 883                   | 0.784      | 0.00004172          |            |
|                                           |                                    | TGN38               | 152-153              | 763                   | 0.895      | 0.00000009          |            |
|                                           |                                    | synaptopodin        | 213-214              | 1068                  | 0.882      | 0.00000025          |            |
|                                           | <b>Analysis of mushroom spines</b> | homer               | calreticulin         | 186                   | 930        | 0.820               | 0.00000034 |
|                                           |                                    |                     | ERGIC53              | 208                   | 1040       | 0.901               | 0.00000001 |
| TGN38                                     |                                    |                     | 122                  | 610                   | 0.860      | 0.00000006          |            |
| synaptopodin                              |                                    |                     | 140                  | 700                   | 0.840      | 0.00000016          |            |
| vGLUT1                                    |                                    | calreticulin        | 99                   | 495                   | 0.351      | 0.05465655          |            |
|                                           |                                    | ERGIC53             | 100                  | 500                   | 0.583      | 0.0009192           |            |
|                                           |                                    | TGN38               | 75                   | 375                   | 0.781      | 0.0000124           |            |
|                                           |                                    | synaptopodin        | 79                   | 395                   | 0.705      | 0.0000665           |            |
| SYT1                                      |                                    | calreticulin        | 87                   | 435                   | 0.026      | 0.5600091           |            |
|                                           |                                    | ERGIC53             | 107                  | 535                   | 0.448      | 0.0087806           |            |
|                                           |                                    | TGN38               | 47                   | 235                   | 0.482      | 0.0083918           |            |
|                                           |                                    | synaptopodin        | 61                   | 305                   | 0.687      | 0.0001321           |            |
| head size                                 |                                    | calreticulin size   | 182-183              | 914                   | 0.550      | 0.001554104         |            |
|                                           |                                    | ERGIC53 size        | 209-210              | 1047                  | 0.761      | 0.00002167          |            |
|                                           |                                    | TGN38 size          | 131-132              | 657                   | 0.001      | 0.90780719          |            |
|                                           |                                    | synaptopodin size   | 139-140              | 696                   | 0.820      | 0.00000339          |            |
|                                           |                                    | calreticulin number | 182-183              | 914                   | 0.705      | 0.000008845         |            |
|                                           |                                    | ERGIC53 number      | 209-210              | 1047                  | 0.901      | 0.00000006          |            |
|                                           |                                    | TGN38 number        | 131-132              | 657                   | 0.653      | 0.0002669           |            |
|                                           |                                    | synaptopodin number | 139-140              | 696                   | 0.964      | 0.0000000           |            |
| <b>Analysis of stubby spines</b>          | homer                              | calreticulin        | 61                   | 305                   | 0.820      | 0.00000034          |            |
|                                           |                                    | ERGIC53             | 81                   | 405                   | 0.651      | 0.0002730           |            |
|                                           |                                    | TGN38               | 51                   | 255                   | 0.502      | 0.0030688           |            |
|                                           |                                    | synaptopodin        | 53                   | 265                   | 0.860      | 0.00000006          |            |
|                                           | vGLUT1                             | calreticulin        | 24                   | 120                   | 0.193      | 0.1757708           |            |
|                                           |                                    | ERGIC53             | 46                   | 230                   | 0.687      | 0.0001321           |            |
|                                           |                                    | TGN38               | 36                   | 180                   | 0.820      | 0.00000034          |            |
|                                           |                                    | synaptopodin        | 31                   | 155                   | 0.260      | 0.0620052           |            |
|                                           | SYT1                               | calreticulin        | 37                   | 185                   | 0.129      | 0.1874141           |            |
|                                           |                                    | ERGIC53             | 34                   | 170                   | 0.316      | 0.0363651           |            |
|                                           |                                    | TGN38               | 15                   | 75                    | 0.396      | 0.0378569           |            |
|                                           |                                    | synaptopodin        | 22                   | 110                   | 0.193      | 0.1325609           |            |

**Supplementary Table 1 continued:** List of statistical values and number of synapses per individual experiments.

| <b>Type of analysis</b>                                           | <b>Synaptic marker</b> | <b>POI</b>   | <b>Synapses /bin</b> | <b>Total synapses</b> | <b>Rho</b> | <b>P (spearman)</b> |
|-------------------------------------------------------------------|------------------------|--------------|----------------------|-----------------------|------------|---------------------|
| <b>Automatic analysis of all synapses - Radial redistribution</b> | homer                  | calreticulin | 643                  | 3215                  | 0.899      | 0.03738607          |
|                                                                   |                        | ERGIC53      | 680                  | 3400                  | 0.899      | 0.03738607          |
|                                                                   |                        | TGN38        | 379-380              | 1899                  | 0.300      | 0.62383766          |
|                                                                   |                        | synaptopodin | 542-543              | 2712                  | 0.999      | 0.00000000          |
|                                                                   | vGLUT1                 | calreticulin | 487-488              | 2439                  | 0.899      | 0.03738607          |
|                                                                   |                        | ERGIC53      | 265-266              | 1326                  | 0.499      | 0.39100221          |
|                                                                   |                        | TGN38        | 117-118              | 588                   | 0.199      | 0.74706007          |
|                                                                   |                        | synaptopodin | 159-160              | 796                   | 0.999      | 0.00000000          |
|                                                                   | SYT1                   | calreticulin | 249                  | 1245                  | 0.999      | 0.00000000          |
|                                                                   |                        | ERGIC53      | 176-177              | 883                   | 0.999      | 0.00000000          |
|                                                                   |                        | TGN38        | 152-153              | 763                   | 0.899      | 0.03738607          |
|                                                                   |                        | synaptopodin | 213-214              | 1068                  | 0.999      | 0.00000000          |

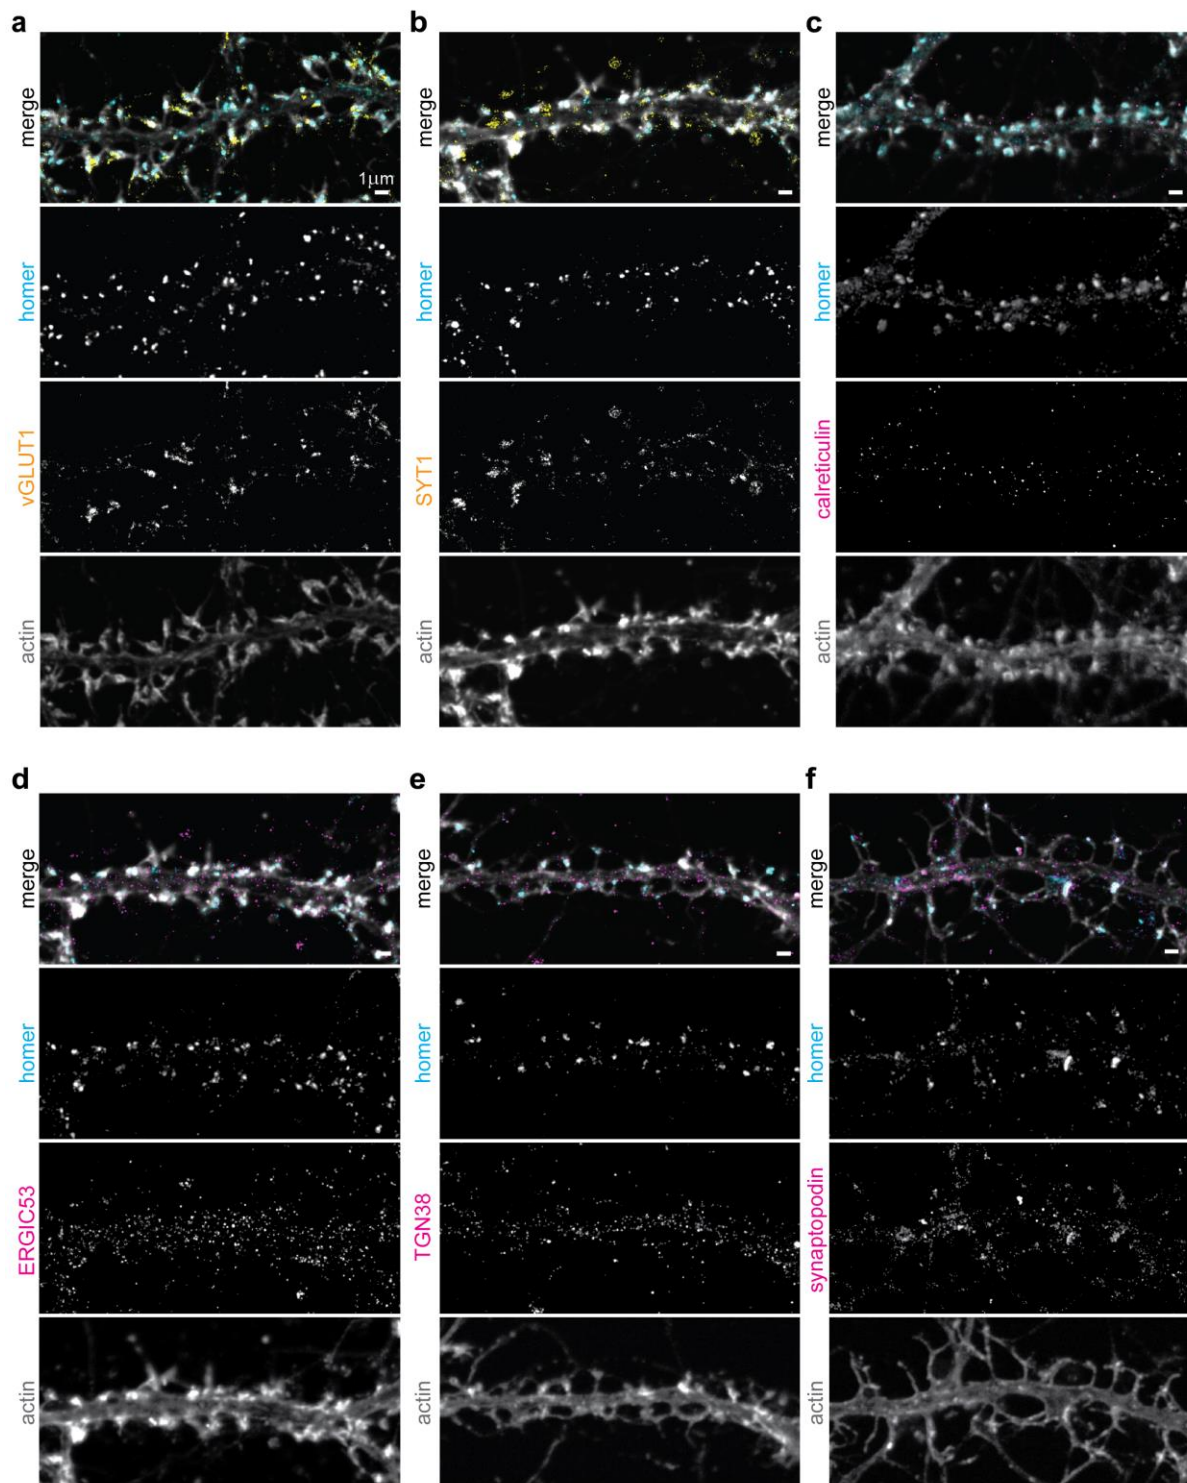

**Supplementary Figure 1: Representative images of vGLUT1 and SYT1 compared to homer, and of the POIs stainings.** Representative STED images of dendrites in mature hippocampal neuronal cultures. Samples were all stained with homer, phalloidin (actin, confocal), with pre- and post-synaptic sites markers vGLUT1 **(a)** or SYT1 **(b)**, and for the proteins of interest: calreticulin **(c)**, ERGIC53 (same dendrite as shown in b) **(d)**, TGN38 **(e)**, and synaptopodin **(f)**. Scale bars: 1  $\mu\text{m}$ .

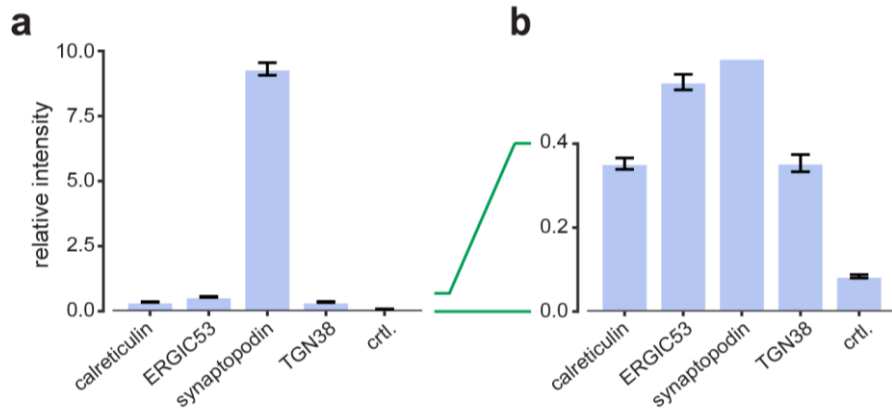

**Supplementary Figure 2: Comparison of average intensities of the individual POIs.**

Average staining intensity of the different POIs and control samples in which the primary antibody was omitted. Comparison of all stainings (a) and close up on the lower intensities (b). All data was collected from 3 independent experiments. Whiskers represent S.E.M.

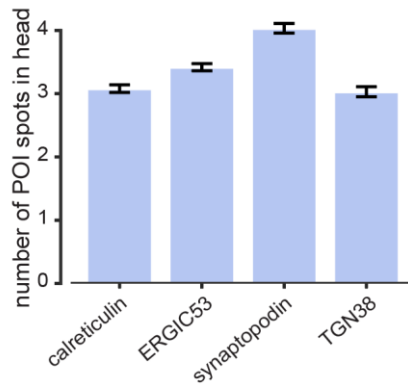

**Supplementary Figure 3: Average spot number of secretory elements in mushroom spines.** Average numbers of spots of calreticulin, ERGIC53, TGN38, and synaptopodin inside the spine head after manual segmentation. All data was collected from 3 independent experiments. Whiskers represent S.E.M.

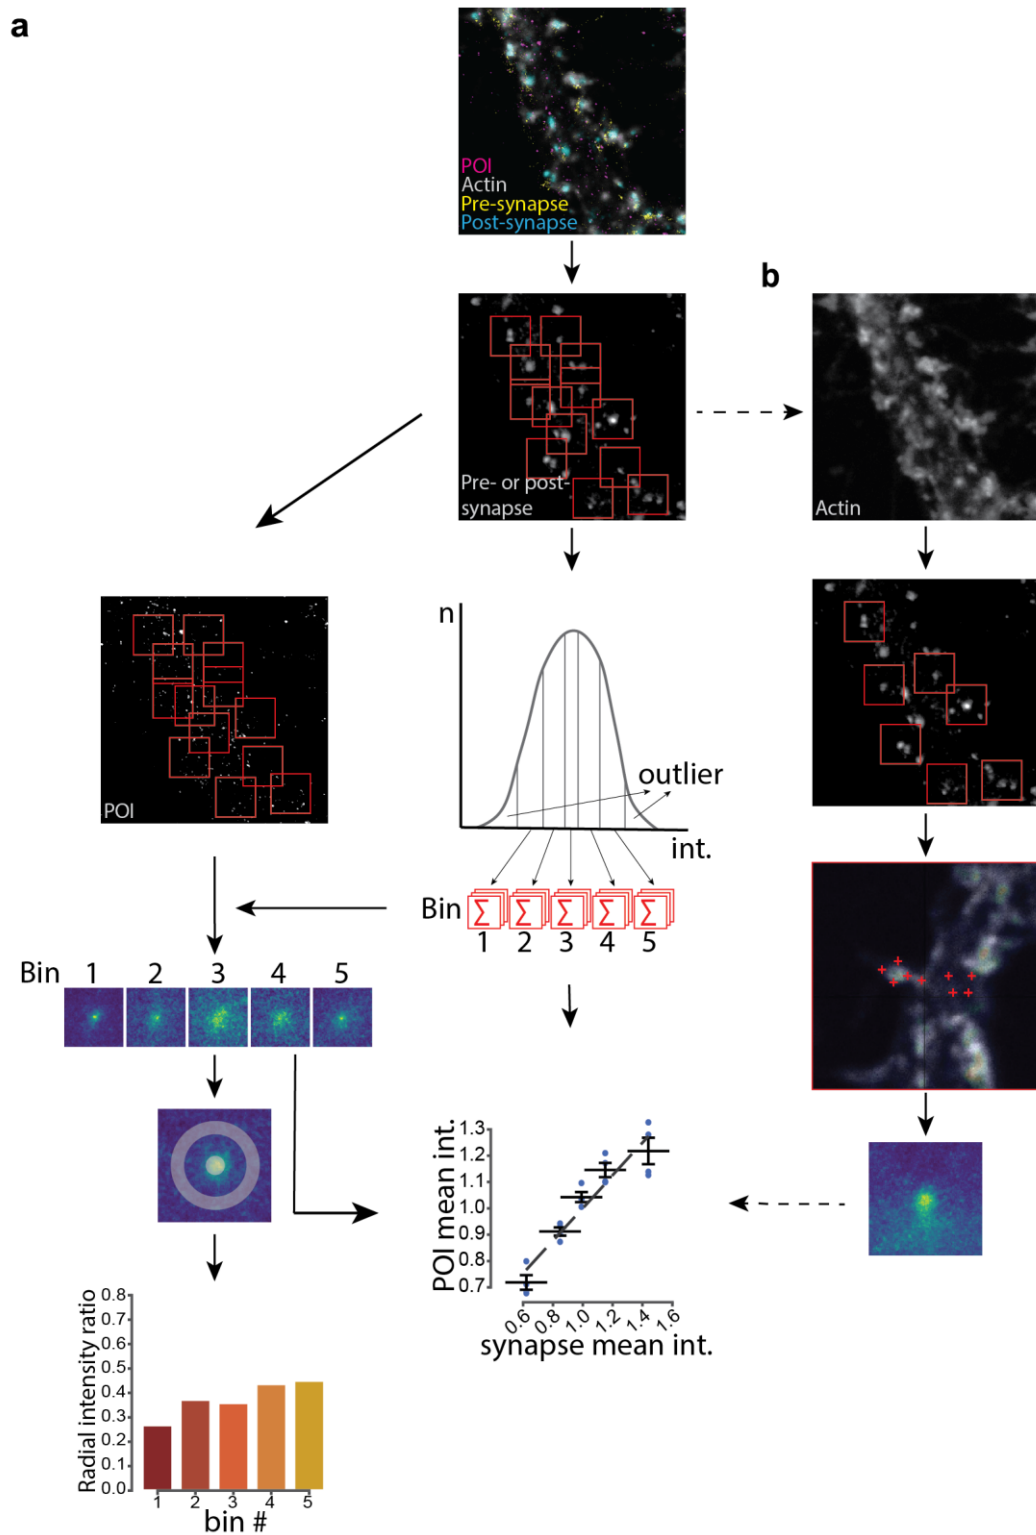

**Supplementary Figure 4: Image analysis workflow.** 4-colour images were acquired of the protein of interest (magenta), actin (white) and pre- and post-synaptic markers (yellow and cyan respectively). (a) Automatic analysis: the pre-/post-synaptic markers were used to identify synaptic puncta in the images.  $3 \times 3 \mu\text{m}$  square regions were extracted for each synapse and pooled into five bins based on increasing fluorescence intensity of the synaptic

markers. The POI images were averaged for each bin and correlated to the average intensity of the synaptic markers. Alternatively, a ratio was calculated between the outer rim and the central area of each average image to determine the tendency of the POI to localize to the synapse proximity. (b) Manual analysis: the post-synaptic marker was used to locate dendritic spines and extract 3 x 3  $\mu\text{m}$  square regions as in (a). The actin channel of the images was then used to manually determine the borders of the spines in order to align them to a similar orientation before subsequent analysis.



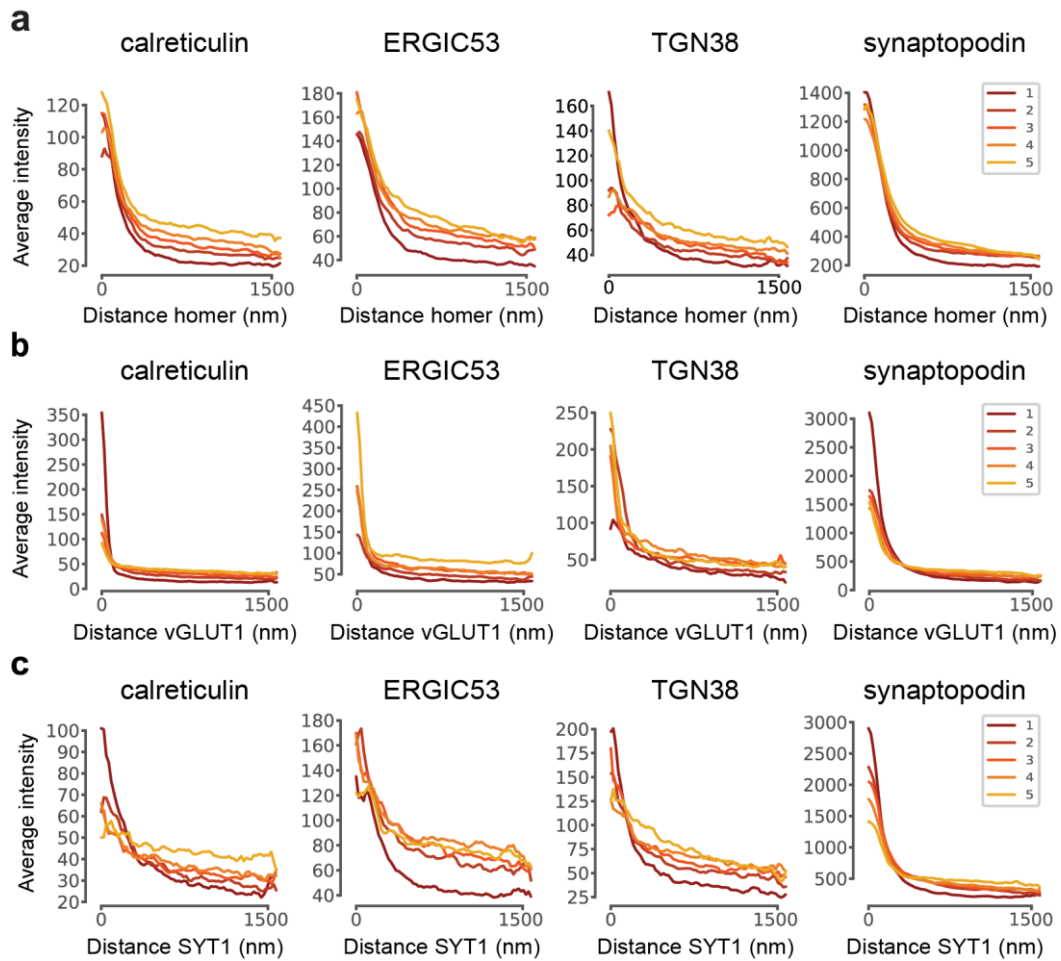

**Supplementary Figure 5: Radial profile plots of the average intensity images.** Radial profiles for bins of each POI: homer (**a**), vGLUT1 (**b**), and SYT1 (**c**). Bins 1-5 (dark red-yellow) were used for calculating the ratios depicted in Fig. 2b, 3b, and 4b, respectively.

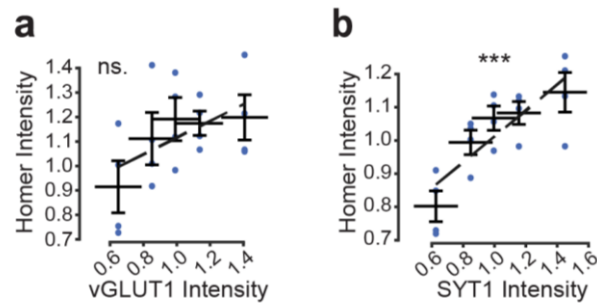

**Supplementary Figure 6: Intensity correlations of pre-and post-synaptic markers.**

Correlation of homer intensities and the average intensities of vGLUT1 (a) and SYT1 (b).

Dashed lines are the linear fits. All data was collected from four independent experiments.

Where  $*=p<0.05$ ,  $**=p<0.01$ ,  $***=p<0.001$ ,  $****=p<0.0001$ , and ns.=non-significant. Whiskers

represent S.E.M. Numbers of synapses per each bin and Spearman's rho are listed in

Supplementary Table 1.

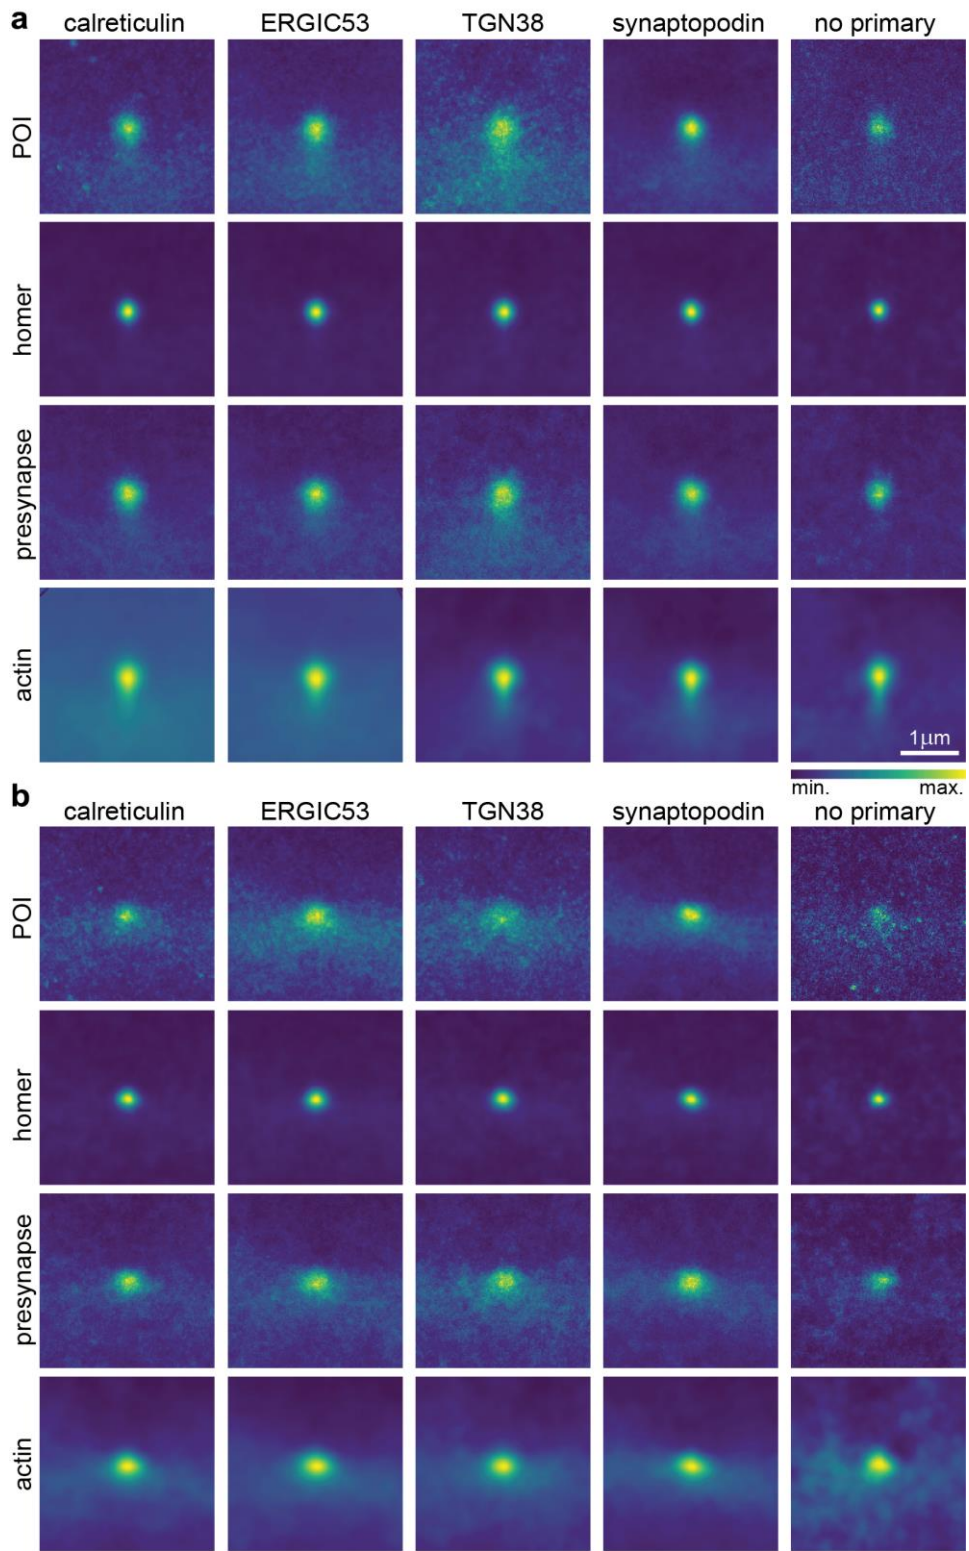

**Supplementary Figure 7: Average images of spines after manual segmentation.**

Average images of mushroom **(a)** and stubby **(b)** spines of the POIs, homer, average pre-synaptic markers vGLUT1 and SYT1, and phalloidin. Intensities have been adjusted for each image. Average images of the POIs shown in panel (a) are the same average images depicted in Fig. 5a.

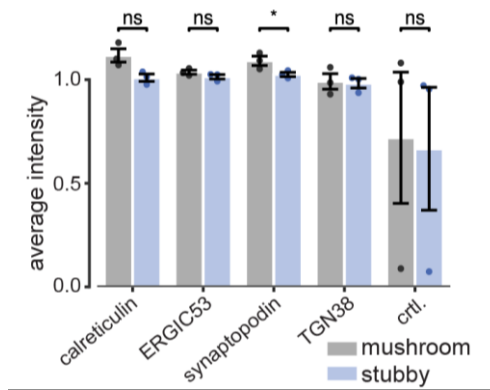

**Supplementary Figure 8: Comparison of average intensities of mushroom and stubby spines.** Average staining intensities of POI normalised to experimental means. Whiskers represent S.E.M.

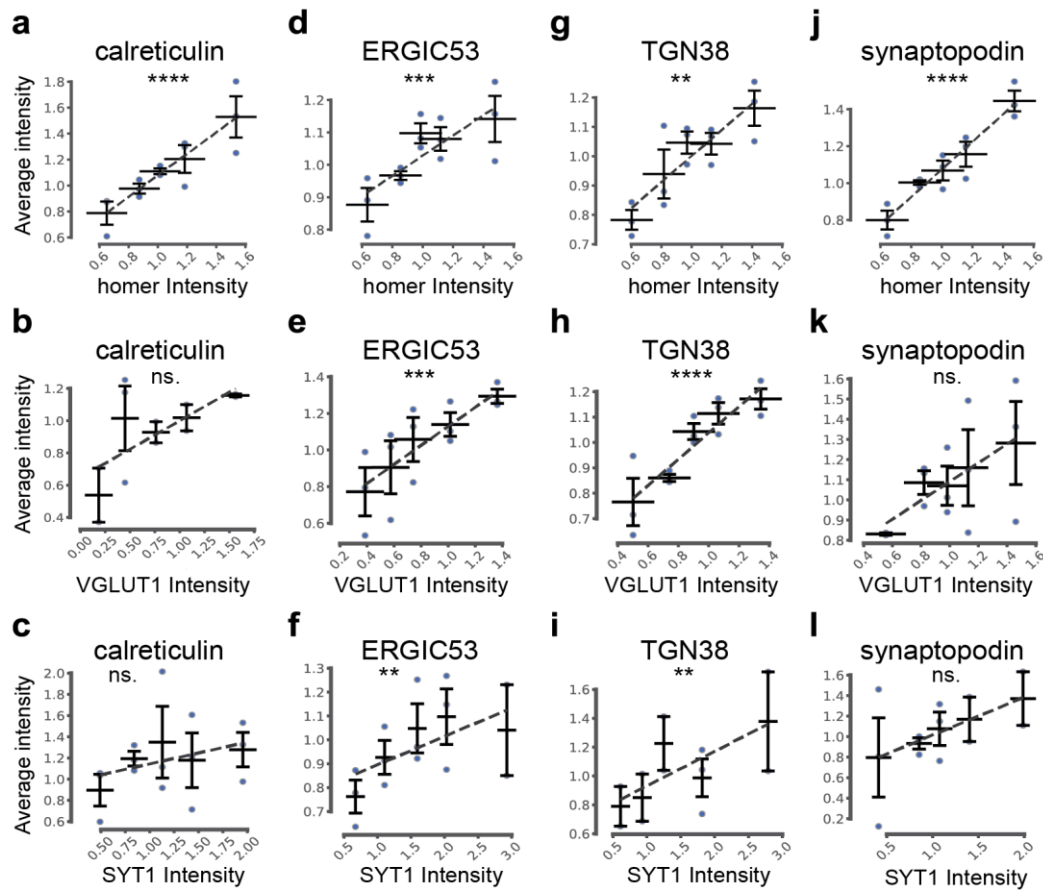

**Supplementary Figure 9: Correlations of secretory elements at stubby spines. (a-l)**

Average intensity correlations after manual spine segmentation and classification of stubby type spines. Average intensities of calreticulin (a-c), ERGIC53 (d-f), TGN38 (g-i), and synaptopodin (j-l) correlated with average intensities of homer (a,d,g,j), vGLUT1 (d,e,h,k), and SYT1 (c,f,i,l). Dashed lines are linear fits. All data were collected from three independent experiments. Where \*= $p < 0.05$ , \*\*= $p < 0.01$ , \*\*\*= $p < 0.001$ , \*\*\*\*= $p < 0.0001$ , and ns.=non-significant. Whiskers represent S.E.M. Numbers of synapses per each bin and Spearman's rho are listed in Supplementary Table 1.

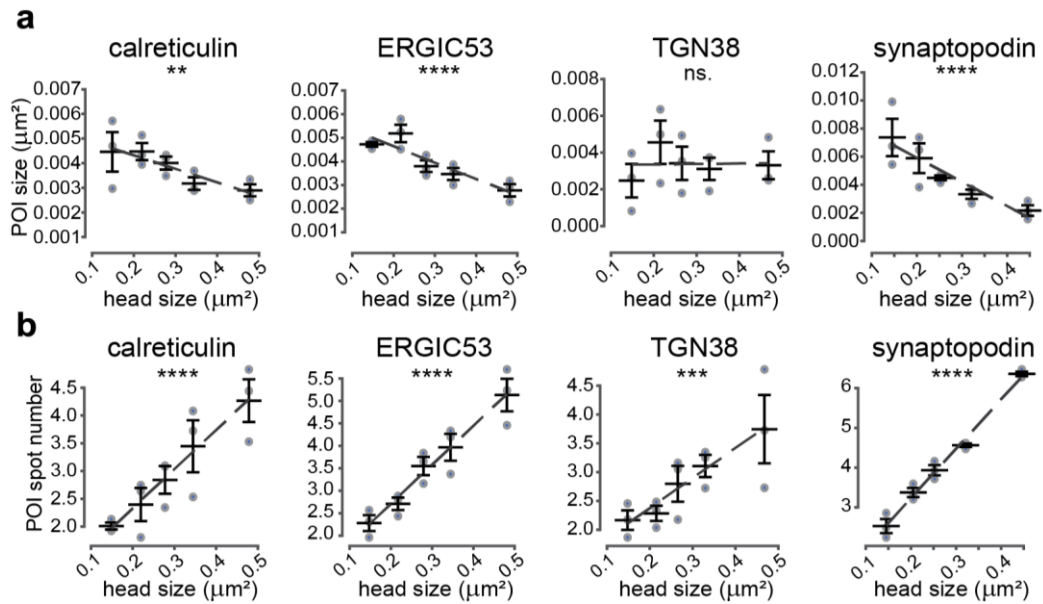

**Supplementary Figure 10: Correlations of POI spot size and numbers and synaptic size in mushroom spines. (a)** Correlation between average protein spot size of calreticulin, ERGIC53, TGN38, and synaptopodin inside the spine head and head size, as defined by manual segmentation. **(b)** Correlation between average spot numbers of calreticulin, ERGIC53, TGN38, and synaptopodin inside the spine head correlated to the head size as defined by manual segmentation. Dashed lines are linear fits. Where  $*=p<0.05$ ,  $**=p<0.01$ ,  $***=p<0.001$ , and  $****=p<0.0001$ . Whiskers represent S.E.M. Numbers of synapses per each bin and Spearman's rho are listed in Supplementary Table 1.

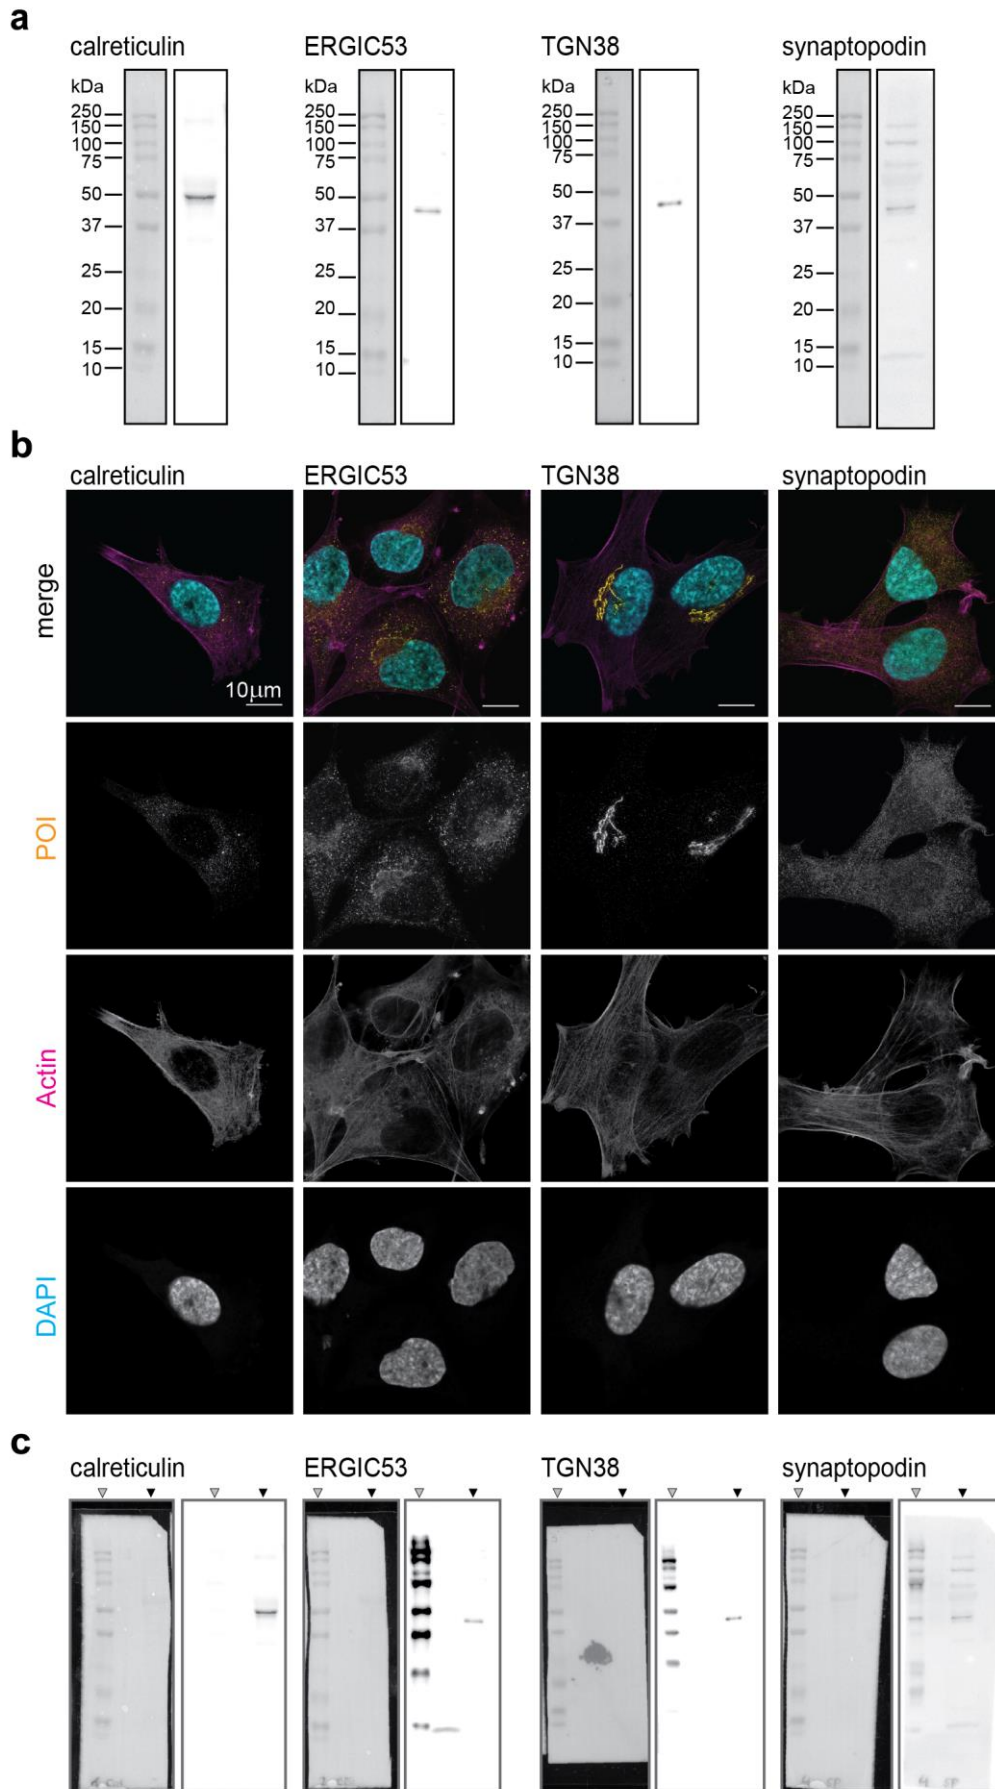

**Supplementary Figure 11: Antibody validation. (a)** Western blot validation of used POI antibodies in whole cell lysate of PC12 cells (calreticulin, ERGIC53 and synaptopodin) or rat cultured primary cortical neurons (TGN38). Displayed are colourimetric images of the protein ladder (left) and the respective antibody chemiluminescence signal (right) of each individual full-length membrane. Proteins have been blotted and analysed on separate membranes. Brightness and contrast have not been modified and are displayed as raw data. Full colourimetric and chemiluminescence images of the membranes are shown in panel (c).

**(b)** Representative STED images of immunofluorescence in PC12 cells labelled with DAPI (confocal), phalloidin (actin), and the proteins of interest: calreticulin, ERGIC53, TGN38, and synaptopodin. Scale bars: 10  $\mu\text{m}$ . **(c)** Full size membrane images used for panel (a). Left: colourimetric; right: chemiluminescence. Grey arrows indicate the position of the protein ladder; black arrows indicate the lane of the respective cell lysate, as shown in (a). The protein ladder shows aspecific chemiluminescence signal in the case of ERGIC53, TGN38 and synaptopodin. Brightness and contrast have not been modified.



## Supplementary Methods

### Sample preparation and imaging of PC12 cells

PC12 adh cells (AddexBio, cat. C0032002) were cultured on glass coverslips and processed as described in the main text. Actin was labelled with phalloidin-Star635P (Abberior, cat. 2-0205-002-5; 1:100 dilution) and nucleus with DAPI (Biomol, cat. AG-CR1-3668-M005, 1:5000 dilution). Imaging was performed as previously described.

### Western Blot

Whole cell lysate from PC12 adh cells or cultured cortical primary neurons (18 days *in vitro*, prepared as hippocampal cultures), in Laemmli buffer (Bio-Rad, cat. 161-0747) were loaded in a 12% SDS gel (Bio-Rad, cat. 4561045) and subjected to electrophoresis at 50 V for 5 min, followed by 10 V for 80 min. Separated proteins were then transferred onto a PVDF membrane (Bio-Rad, cat. 162-0260) at 120 V for 50 min. The blotted membranes were blocked in Tris-buffered saline, 0.1% Tween (TBST), 3% BSA and incubated overnight with previously described primary antibodies (calreticulin 1:500, ERGIC53 1:1000, TGN38 1:500, synaptopodin 1:1000) in TBST, 1% BSA. Then the membranes were washed five times in TBST and incubated with secondary antibody dilution (Thermo Fisher, cat. 31466, 1:10000) in TBST 1% BSA for 1 hour at room temperature. Afterwards membranes were washed five times in TBST, incubated for 1 min with ECL western blotting substrate (Thermo Fisher, cat. 32109) and signal was detected in a Chemidoc System (Bio-Rad Laboratories GmbH, Germany).
